# Supplementary material
Source: PubMed Central journal article supplement (PMC1805558)

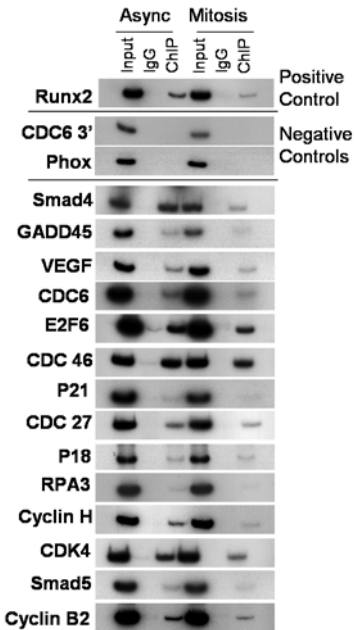

Supplement: pnas_0611419104_1.pdf [file pnas_0611419104_1.pdf]
